# Supplementary material for: Evaluation of different Kabuli chickpea genotypes against Helicoverpa armigera (Hübner) (Lepidoptera: Noctuidae) in relation to biotic and abiotic factors
Source: PeerJ. 2024 Mar 13;12:e16944. doi: 10.7717/peerj.16944 (PMC10944164; doi:10.7717/peerj.16944)
Supplement: Supplemental Information 1 [file peerj-12-16944-s001.xlsx]

## Sheet: Physiomorphic Characters 
																							Trichomes Density
				Total number of pods per plant 2021-22
	Geno	replic	T.p.W1	T.p.W2	T.p.W3	T.p.W4	T.p.W5	T.p.W6	T.p.W7	T.p.W8										2020-21		2021-22
	1	1	48	49	50	48	51	53	52	49						Genotypes	2020-21	2021-22		SE	Letter	SE	Letter
	1	2	53	51	53	52	54	50	49	54						K-01209	254.6	243.78		8.3	e	6.88	f
	1	3	51	52	52	51	53	54	54	51						K-01211	295.75	282.22		5.73	d	6.33	de
	2	1	55	56	54	56	55	56	53	56						K-01216	326.32	311.69		9.73	bc	8.2	bc
	2	2	51	51	53	51	50	52	51	50						Noor-2019	352.89	344.64		8.29	a	7.43	a
	2	3	49	54	55	55	53	54	55	54						K-01240	272.7	265.68		7.06	e	6.93	e
	3	1	55	53	53	53	54	55	55	57						K-01241	343.03	329.75		7.14	ab	7.98	ab
	3	2	52	54	54	56	55	53	56	54						K-01242	311.49	299.03		7.63	cd	6.49	cd
	3	3	57	51	56	52	57	57	57	55						DG-2017	215.09	208.35		7.33	f	5.58	g
	4	1	52	51	53	51	54	52	55	54						K-01308	231.18	224.08		7.91	f	5.51	fg
	4	2	53	55	56	53	55	54	56	55
	4	3	55	56	57	55	56	55	57	57
	5	1	48	50	50	49	51	52	52	50
	5	2	52	53	55	54	56	54	57	54
	5	3	49	51	53	51	53	57	54	51													Pod wall thickness
	6	1	48	48	52	51	51	54	52	52
	6	2	52	57	57	57	57	56	56	57
	6	3	54	53	55	54	53	54	54	56										2020-21		2021-22
	7	1	55	57	57	56	57	57	56	57						Genotypes	2020-21	2021-22		SE	Letter	SE	Letter
	7	2	52	51	50	52	53	52	54	54						K-01209	0.26	0.25		0.0115	de	0.0145	de
	7	3	53	54	53	53	54	55	55	55						K-01211	0.28	0.27		0.0115	cd	0.0145	cd
	8	1	46	48	48	46	48	46	49	48						K-01216	0.32	0.31		0.0145	bc	0.0145	bc
	8	2	52	45	50	49	52	53	54	51						Noor-2019	0.36	0.35		0.0145	a	0.0115	a
	8	3	48	52	54	50	50	48	51	53						K-01240	0.26	0.27		0.0145	de	0.0145	cd
	9	1	47	48	49	54	47	49	48	49						K-01241	0.33	0.34		0.0145	ab	0.0115	ab
	9	2	50	47	50	48	48	51	49	52						K-01242	0.29	0.3		0.0115	bcd	0.0115	bc
	9	3	52	50	52	50	53	52	52	47						DG-2017	0.22	0.21		0.0145	f	0.012	e
																K-01308	0.23	0.24		0.0115	ef	0.0115	de
																						Chlorophyll contents
																				2020-21		2021-22
																Genotypes	2020-21	2021-22		SE	Letter	SE	Letter
																K-01209	1.5	1.54		0.0173	b	0.026	b
																K-01211	1.24	1.26		0.0145	d	0.0231	d
																K-01216	1.04	1.09		0.0173	f	0.0203	e
																Noor-2019	0.75	0.81		0.0173	h	0.0208	d
																K-01240	1.32	1.37		0.0173	c	0.0176	c
																K-01241	0.91	0.95		0.0203	g	0.0145	f
																K-01242	1.18	1.2		0.0173	e	0.0233	d
																DG-2017	1.64	1.66		0.0145	a	0.0145	a
																K-01308	1.6	1.58		0.0145	a	0.0203	b

## Sheet: Abiotic factors
									2020-21
Geno	replic	W1DP	T.pods.W1	W1%age	W2DP	T.pods.W2	W2%age	W3DP	T.pods.W3	W3%age	W4DP	T.pods.W4	W4%age	W5DP	T.pods.W5	W5%age	W6DP	T.pods.W6	W6%age	W7DP	T.pods.W7	W7%age	W8DP	T.pods.W8	W8%age
1	1	2.22	48	4.625	4.98	49	10.1633	10.3	50	20.6	11.5	48	23.9583	14.65	51	28.7255	17.7	53	33.3962	20.6	52	39.6154	22.84	49	46.6122
1	2	2.15	53	4.0566	4.85	51	9.5098	9.8	53	18.4906	10.75	52	20.6731	13.98	54	25.8889	16.95	50	33.9	19.4	49	39.5918	21.55	54	39.9074
1	3	2.05	51	4.01961	4.7	52	9.03846	9	52	17.3077	9.98	51	19.5686	13.4	53	25.283	15.9	54	29.4444	18.5	54	34.2593	20.38	51	39.9608
2	1	1.78	55	3.23636	4.22	56	7.53571	8.98	54	16.6296	10.11	56	18.0536	13.1	55	23.8182	15.9	56	28.3929	17.92	53	33.8113	20.44	56	36.5
2	2	1.7	51	3.33333	4.14	51	8.11765	8.27	53	15.6038	8.97	51	17.5882	11.9	50	23.8	14.6	52	28.0769	17.27	51	33.8627	18.72	50	37.44
2	3	1.86	49	3.79592	4.32	54	8	9.58	55	17.4182	10.97	55	19.9455	13.96	53	26.3396	16.56	54	30.6667	19.02	55	34.5818	21.97	54	40.6852
3	1	1.5	55	2.72727	3.79	53	7.15094	7.72	53	14.566	9.1	53	17.1698	11.5	54	21.2963	13.55	55	24.6364	15.54	55	28.2545	17.6	57	30.8772
3	2	1.42	52	2.73077	3.67	54	6.7963	7.28	54	13.4815	8	56	14.2857	10.6	55	19.2727	12.28	53	23.1698	14.8	56	26.4286	16.95	54	31.3889
3	3	1.34	57	2.35088	3.55	51	6.96078	6.9	56	12.3214	7.03	52	13.5192	8.9	57	15.614	11.7	57	20.5263	14	57	24.5614	14.45	55	26.2727
4	1	1.05	52	2.01923	3.09	51	6.05882	5.55	53	10.4717	5.53	51	10.8431	7.4	54	13.7037	10	52	19.2308	11.7	55	21.2727	13.2	54	24.4444
4	2	1.12	53	2.11321	3.15	55	5.72727	6.1	56	10.8929	6.38	53	12.0377	8.25	55	15	10.54	54	19.5185	12.55	56	22.4107	14	55	25.4545
4	3	1.2	55	2.18182	3.27	56	5.83929	6.7	57	11.7544	7.66	55	13.9273	9.58	56	17.1071	11.3	55	20.5455	13.14	57	23.0526	15.08	57	26.4561
5	1	2.08	48	4.33333	4.64	50	9.28	10.2	50	20.4	11.3	49	23.0612	14.8	51	29.0196	17.55	52	33.75	20	52	38.4615	22.3	50	44.6
5	2	1.92	52	3.69231	4.48	53	8.45283	8.65	55	15.7273	9.5	54	17.5926	12.7	56	22.6786	15.1	54	27.963	18.2	57	31.9298	20.6	54	38.1481
5	3	2	49	4.08163	4.56	51	8.94118	9.15	53	17.2642	10.05	51	19.7059	13.5	53	25.4717	16.65	57	29.2105	19.28	54	35.7037	22.1	51	43.3333
6	1	1.22	48	2.54167	3.21	48	6.6875	5.8	52	11.1538	6.25	51	12.2549	8.6	51	16.8627	10.95	54	20.2778	12.54	52	24.1154	14.15	52	27.2115
6	2	1.38	52	2.65385	3.5	57	6.14035	7.6	57	13.3333	8.35	57	14.6491	10.6	57	18.5965	12.55	56	22.4107	14.44	56	25.7857	16	57	28.0702
6	3	1.3	54	2.40741	3.29	53	6.20755	6.55	55	11.9091	7.1	54	13.1481	8.85	53	16.6981	11.4	54	21.1111	13.1	54	24.2593	15.2	56	27.1429
7	1	1.55	55	2.81818	4.06	57	7.12281	8.45	57	14.8246	9.4	56	16.7857	12	57	21.0526	14.6	57	25.614	17.6	56	31.4286	19.5	57	34.2105
7	2	1.5	52	2.88462	3.95	51	7.7451	7.27	50	14.54	8.2	52	15.7692	11.2	53	21.1321	13.9	52	26.7308	16.4	54	30.3704	18.7	54	34.6296
7	3	1.62	53	3.0566	4.16	54	7.7037	9.25	53	17.4528	10.25	53	19.3396	12.8	54	23.7037	15.95	55	29	18.2	55	33.0909	20.5	55	37.2727
8	1	2.45	46	5.32609	5.5	48	11.4583	11.34	48	23.625	12.94	46	28.1304	16.1	48	33.5417	19.1	46	41.5217	22	49	44.898	24	48	50
8	2	2.36	52	4.53846	5.25	45	11.6667	10.1	50	20.2	11.65	49	23.7755	15.36	52	29.5385	18.05	53	34.0566	20.96	54	38.8148	23.2	51	45.4902
8	3	2.28	48	4.75	5.05	52	9.71154	9.3	54	17.2222	10.8	50	21.6	14.45	50	28.9	17.22	48	35.875	20.2	51	39.6078	22.38	53	42.2264
9	1	2.2	47	4.68085	4.725	48	9.84375	8.85	49	18.0612	10.15	54	18.7963	14.55	47	30.9574	16.3	49	33.2653	19.2	48	40	21.45	49	43.7755
9	2	2.25	50	4.5	5.025	47	10.6915	10	50	20	11.3	48	23.5417	14.9	48	31.0417	17.4	51	34.1176	20.4	49	41.6327	22.15	52	42.5962
9	3	2.32	52	4.46154	5.355	50	10.71	11.2	52	21.5385	12.58	50	25.16	15.3	53	28.8679	18.6	52	35.7692	21	52	40.3846	23.2	47	49.3617
									2021-22
												Min.	Max.
											Date	Temp.	Temp.
											1-6 Mar	13.08	27.05
											7-12 Mar	13.95	29.87
											13-18 Mar	19.01	35.67
											19-24 Mar	18.6	33.75
											25-31 Mar	19.26	36.6
											1-6 Apr	19.88	38.82
											7-12 Apr	21.08	40.22
											13-18 Apr	22.31	41.82
												Humidity at 8:00 AM and 5 PM
												Date	08:00:00	17:00:00
												1-6 Mar	77.45	46.17
												7-12 Mar	78.16	45.5
												13-18 Mar	64.16	43.83
												19-24 Mar	69.83	44.5
												25-31 Mar	57.29	31
												1-6 Apr	49.67	21.33
												7-12 Apr	41.67	20
												13-18 Apr	40.66	19.5

## Sheet: Physiomorphic ch. corelations
								2020-21
	genoty	replic	week1	week2	week3	week4	week5	week6	week7	week8	Average
	1	1	0.83	1.06	0.95	1.08	1.34	1.22	1.44	1.59	1.18875
	1	2	0.91	1.11	1.01	1.15	1.42	1.31	1.54	1.65	1.2625
	1	3	0.87	1.09	0.98	1.11	1.37	1.26	1.49	1.63	1.225
	2	1	0.81	1.03	0.92	1.05	1.27	1.15	1.39	1.49	1.13875
	2	2	0.7	0.94	0.84	0.97	1.19	1.05	1.3	1.42	1.05125
	2	3	0.76	0.99	0.87	1.02	1.23	1.09	1.34	1.46	1.095
	3	1	0.59	0.82	0.7	0.86	1.04	0.93	1.13	1.29	0.92
	3	2	0.63	0.86	0.74	0.9	1.08	0.97	1.17	1.32	0.95875
	3	3	0.67	0.91	0.8	0.96	1.12	1.02	1.22	1.36	1.0075
	4	1	0.5	0.69	0.6	0.76	0.93	0.81	1	1.17	0.8075
	4	2	0.54	0.73	0.66	0.81	0.96	0.85	1.04	1.2	0.84875
	4	3	0.59	0.79	0.7	0.85	1.01	0.89	1.09	1.24	0.895
	5	1	0.76	1	0.9	1.02	1.24	1.12	1.36	1.5	1.1125
	5	2	0.84	1.09	0.98	1.11	1.34	1.22	1.44	1.57	1.19875
	5	3	0.8	1.04	0.93	1.06	1.28	1.16	1.4	1.54	1.15125
	6	1	0.55	0.76	0.65	0.81	0.97	0.88	1.06	1.22	0.8625
	6	2	0.63	0.85	0.75	0.9	1.06	0.97	1.13	1.3	0.94875
	6	3	0.59	0.79	0.69	0.86	1.02	0.92	1.1	1.26	0.90375
	7	1	0.74	0.97	0.86	1.01	1.21	1.09	1.32	1.44	1.08
	7	2	0.65	0.89	0.77	0.92	1.11	1	1.24	1.36	0.9925
	7	3	0.7	0.93	0.82	0.96	1.16	1.04	1.28	1.41	1.0375
	8	1	0.93	1.17	1.06	1.22	1.46	1.36	1.63	1.75	1.3225
	8	2	1.03	1.27	1.16	1.29	1.55	1.44	1.72	1.82	1.41
	8	3	0.97	1.23	1.11	1.26	1.51	1.4	1.67	1.77	1.365
	9	1	0.92	1.15	1.05	1.18	1.44	1.34	1.56	1.71	1.29375
	9	2	0.97	1.19	1.08	1.22	1.49	1.38	1.61	1.74	1.335
	9	3	0.86	1.08	0.99	1.15	1.4	1.31	1.53	1.68	1.25
											0.33	11.88
											0.29	15.43
											0.22	22.9
	Geno	replic	week1	week2	week3	week4	week5	week6	week7	week8	Avg.	21.52
	1	1	2.3	4.35	5.05	6.6	9.8	10.9	14.65	16.9	8.81875
	1	2	3.6	5.85	6.93	8.45	11.85	12.7	16.88	18.55	10.6012
	1	3	3	5.1	5.95	7.8	10.65	11.76	15.74	17.05	9.63125
	2	1	3.05	5.05	6.05	7.7	10.51	11.66	14.6	16	9.3275
	2	2	1.15	3.65	4.1	5.72	9.5	10.3	13.7	14.5	7.8275
	2	3	2.4	4.25	5.25	6.58	9.85	11	14.3	15.35	8.6225
	3	1	1	2.75	3.3	4.95	7.9	9.15	10.65	11.65	6.41875
	3	2	1.45	3.6	4.4	5.75	8.4	9.6	12.35	12.52	7.25875
	3	3	2.15	4.65	5.8	6.55	9.4	10.8	13.15	13.95	8.30625
	4	1	0.5	2	2.75	3.78	5.9	6.7	8.6	9.3	4.94125
	4	2	1.15	2.6	3.6	4.65	6.7	7.5	9.4	10.04	5.705	Percent pod damage
	4	3	1.75	3.5	4.4	5.5	7.6	8.4	10.5	10.9	6.56875	19.53
	5	1	1.9	4.13	4.9	6.3	9.55	10.68	13.5	15.7	8.3325	16.72
	5	2	3.15	5.2	6.45	7.9	11.33	12.3	16.45	17.22	10	13.57
	5	3	2.4	4.8	5.4	7.4	10.47	11.46	15.1	16.44	9.18375	10.65
	6	1	0.6	2.6	3.25	4.3	6.7	7.65	9.32	9.82	5.53	18.04
	6	2	2	4.1	4.85	5.9	8.1	9	11.56	11.98	7.18625	11.88
	6	3	1.3	3.25	4.33	5.45	7.5	8.25	10.1	10.7	6.36	15.43
	7	1	2.45	4.85	5.85	7.2	10.02	11.3	14.45	15.65	8.97125	22.9
	7	2	1.5	3.1	3.65	5.4	8.5	9.68	12.6	14	7.30375	21.52
	7	3	1.8	4.05	4.75	6.24	9.32	10.52	13.68	15.15	8.18875
	8	1	2.95	5	5.85	8	11.1	12.18	16.1	18.55	9.96625
	8	2	4.9	7	7.8	10.05	13.2	14.32	18.5	20.85	12.0775
	8	3	3.5	5.8	6.78	9.08	11.95	13.5	17.55	20.2	11.045
	9	1	3.05	5.35	6.5	8	11.25	12.2	16.5	18.75	10.2
	9	2	4.55	6	7.2	9.25	12.15	13.5	17.3	19.7	11.2063
	9	3	2.71	4.95	5.4	7.3	10.35	11.4	15.4	17.25	9.345
											Trichome density	Percent pod damage
											243.78	24.11
											282.22	21.55
											311.69	16.93
											344.64	14.25
											265.68	23.03
											329.75	15.65
											299.03	19.93
											208.35	26.94
											224.08	25.99
												Pod wall thickness	Percent pod damage
												0.25	24.11
												0.27	21.55
												0.31	16.93
												0.35	14.25
												0.27	23.03
												0.34	15.65
												0.3	19.93
												0.21	26.94
												0.24	25.99
												Leaves chlorophyll contents	Percent pod damage
												1.54	24.11
												1.26	21.55
												1.09	16.93
												0.81	14.25
												1.37	23.03
												0.95	15.65
												1.2	19.93
												1.66	26.94
												1.58	25.99

## Sheet: Abiotic factors correlations
							2020-21
				Percent pod damage 2021-22
	Geno	replic	W1%age	W2%age	W3%age	W4%age	W5%age	W6%age	W7%age	W8%age	Avg.	Avg. population
	1	1	4.625	10.1633	20.6	23.9583	28.7255	33.3962	39.6154	46.6122	25.962	0.75
	1	2	4.0566	9.5098	18.4906	20.6731	25.8889	33.9	39.5918	39.9074	24.0023	0.98
	1	3	4.01961	9.03846	17.3077	19.5686	25.283	29.4444	34.2593	39.9608	22.3602	0.87
	2	1	3.23636	7.53571	16.6296	18.0536	23.8182	28.3929	33.8113	36.5	20.9972	1.02
	2	2	3.33333	8.11765	15.6038	17.5882	23.8	28.0769	33.8627	37.44	20.9778	1.23
	2	3	3.79592	8	17.4182	19.9455	26.3396	30.6667	34.5818	40.6852	22.6791	1.12
	3	1	2.72727	7.15094	14.566	17.1698	21.2963	24.6364	28.2545	30.8772	18.3348	1.34
	3	2	2.73077	6.7963	13.4815	14.2857	19.2727	23.1698	26.4286	31.3889	17.1943	1.48
	3	3	2.35088	6.96078	12.3214	13.5192	15.614	20.5263	24.5614	26.2727	15.2659
	4	1	2.01923	6.05882	10.4717	10.8431	13.7037	19.2308	21.2727	24.4444	13.5056
	4	2	2.11321	5.72727	10.8929	12.0377	15	19.5185	22.4107	25.4545	14.1444
	4	3	2.18182	5.83929	11.7544	13.9273	17.1071	20.5455	23.0526	26.4561	15.108
	5	1	4.33333	9.28	20.4	23.0612	29.0196	33.75	38.4615	44.6	25.3632
	5	2	3.69231	8.45283	15.7273	17.5926	22.6786	27.963	31.9298	38.1481	20.7731
	5	3	4.08163	8.94118	17.2642	19.7059	25.4717	29.2105	35.7037	43.3333	22.964
	6	1	2.54167	6.6875	11.1538	12.2549	16.8627	20.2778	24.1154	27.2115	15.1382
	6	2	2.65385	6.14035	13.3333	14.6491	18.5965	22.4107	25.7857	28.0702	16.455
	6	3	2.40741	6.20755	11.9091	13.1481	16.6981	21.1111	24.2593	27.1429	15.3604
	7	1	2.81818	7.12281	14.8246	16.7857	21.0526	25.614	31.4286	34.2105	19.2321
	7	2	2.88462	7.7451	14.54	15.7692	21.1321	26.7308	30.3704	34.6296	19.2252
	7	3	3.0566	7.7037	17.4528	19.3396	23.7037	29	33.0909	37.2727	21.3275
	8	1	5.32609	11.4583	23.625	28.1304	33.5417	41.5217	44.898	50	29.8127
	8	2	4.53846	11.6667	20.2	23.7755	29.5385	34.0566	38.8148	45.4902	26.0101
	8	3	4.75	9.71154	17.2222	21.6	28.9	35.875	39.6078	42.2264	24.9866
	9	1	4.68085	9.84375	18.0612	18.7963	30.9574	33.2653	40	43.7755	24.9225
	9	2	4.5	10.6915	20	23.5417	31.0417	34.1176	41.6327	42.5962	26.0152
	9	3	4.46154	10.71	21.5385	25.16	28.8679	35.7692	40.3846	49.3617	27.0317
	Geno	replic	W1%age	W2%age	W3%age	W4%age	W5%age	W6%age	W7%age	W8%age	Avg.
	1	1	5	9.25532	10.5208	14.3478	20	21.3725	29.3	35.9574	18.2192
	1	2	7.05882	11.9388	13.5882	16.9	22.7885	26.4583	35.9149	35.6731	21.2901
	1	3	6.12245	10.2	11.9	15.9184	20.8824	22.6154	30.2692	34.7959	19.088	Avg. population
	2	1	5.75472	9.35185	11.6346	14.2593	19.8302	21.5926	28.6275	29.6296	17.585	0.75
	2	2	2.34694	7.44898	8.03922	11.6735	19.7917	20.6	27.9592	30.2083	16.0085	0.98
	2	3	5.10638	8.17308	9.90566	12.4151	19.3137	21.1538	26.9811	29.5192	16.571	0.87
	3	1	1.85185	5.28846	6.34615	9.51923	14.9057	16.9444	19.7222	20.8036	11.9227	1.02
	3	2	2.84314	6.79245	8.30189	10.4545	15.5556	18.4615	22.4545	23.6226	13.5608	1.23
	3	3	3.83929	9.3	10.5455	12.8431	16.7857	19.2857	23.4821	25.8333	15.2393	1.12
	4	1	0.980392	4	5.28846	7.56	11.1321	13.1373	15.9259	17.5472	9.44641	1.34
	4	2	2.21154	4.81481	6.54545	8.94231	12.4074	14.1509	17.0909	18.5926	10.5945	1.48
	4	3	3.24074	6.36364	7.85714	10.1852	13.8182	15.5556	18.75	19.4643	11.9043
	5	1	4.13043	8.60417	10.2083	13.4043	19.4898	21.36	27	32.7083	17.1132
	5	2	6.3	10.1961	12.1698	15.1923	20.9815	23.6538	29.9091	33.1154	18.9398
	5	3	5.10638	9.79592	10.5882	15.102	20.5294	20.8364	29.0385	33.551	18.0685
	6	1	1.22449	5.53191	6.37255	8.6	13.4	14.434	18.2745	19.2549	10.8865
	6	2	3.57143	7.32143	8.66071	10.5357	14.4643	16.3636	20.2807	21.3929	12.8238
	6	3	2.45283	6.25	8.01852	10.283	14.4231	15.566	19.0566	19.4545	11.9381	Avg. population
	7	1	4.62264	8.81818	10.6364	13.3333	18.2182	20.5455	25.8036	28.4545	16.304	0.75
	7	2	3	6.32653	7.60417	10.8	16.6667	19.36	24.2308	26.9231	14.3639	0.98
	7	3	3.52941	7.78846	9.31373	12.2353	17.9231	19.8491	25.8113	28.5849	15.6294	0.87
	8	1	6.70455	10.8696	12.7174	18.1818	24.1304	27.6818	34.2553	40.3261	21.8584	1.02
	8	2	9.8	16.2791	16.25	21.383	26.4	28.0784	35.5769	40.8824	24.3312	1.23
	8	3	7.6087	11.6	13.0385	18.9167	24.8958	29.3478	35.8163	38.8462	22.5087	1.12
	9	1	6.77778	11.6304	13.8298	15.3846	25	25.9574	35.8696	39.8936	21.7929	1.34
	9	2	9.47917	13.3333	15	20.1087	26.413	27.551	36.8085	39.4	23.5117	1.48
	9	3	5.42	10.3125	10.8	15.2083	20.2941	22.8	30.8	38.3333	19.246
							2021-22
											Avg. min. temp.	Avg. population
											13.08	0.69
											13.95	0.95
											19.01	1.3
											18.6	1.2
											19.26	1.45
											19.88	1.71
											21.08	1.85
											22.31	1.95
												Avg. max. temp.	Avg. population
												27.05	0.69
												29.87	0.95
												35.67	1.3
												33.75	1.2
												36.6	1.45
												38.82	1.71
												40.22	1.85
												41.82	1.95
												R.H at 8:00 AM	Avg. population
												77.45	0.69
												78.16	0.95
												64.16	1.3
		Geno	replic	T.p.W1	T.p.W2	T.p.W3	T.p.W4	T.p.W5	T.p.W6	T.p.W7	T.p.W8	69.83	1.2
		1	1	46	47	48	46	49	51	50	47	57.29	1.45
		1	2	51	49	51	50	52	48	47	52	49.67	1.71
		1	3	49	50	50	49	51	52	52	49	41.67	1.85
		2	1	53	54	52	54	53	54	51	54	40.66	1.95
		2	2	49	49	51	49	48	50	49	48
		2	3	47	52	53	53	51	52	53	52
		3	1	54	52	52	52	53	54	54	56
		3	2	51	53	53	55	54	52	55	53
		3	3	56	50	55	51	56	56	56	54
		4	1	51	50	52	50	53	51	54	53
		4	2	52	54	55	52	54	53	55	54
		4	3	54	55	56	54	55	54	56	56
		5	1	46	48	48	47	49	50	50	48
		5	2	50	51	53	52	54	52	55	52
		5	3	47	49	51	49	51	55	52	49
		6	1	49	47	51	50	50	53	51	51	Avg. population
		6	2	56	56	56	56	56	55	57	56	0.69
		6	3	53	52	54	53	52	53	53	55	0.95
		7	1	53	55	55	54	55	55	56	55	1.3
		7	2	50	49	48	50	51	50	52	52	1.2
		7	3	51	52	51	51	52	53	53	53	1.45
		8	1	44	46	46	44	46	44	47	46	1.71
		8	2	50	43	48	47	50	51	52	51	1.85
		8	3	46	50	52	48	48	46	49	52	1.95
		9	1	45	46	47	52	45	47	46	47
		9	2	48	45	48	46	46	49	47	50
		9	3	50	48	50	48	51	50	50	45
